# Supplementary material for: Systematic profiling of SARS-CoV-2-specific IgG responses elicited by an inactivated virus vaccine identifies peptides and proteins for predicting vaccination efficacy
Source: PubMed Central journal article supplement (PMC8367966; doi:10.1038/s41421-021-00309-7), 2021-08-17
Supplement: 41421_2021_309_MOESM1_ESM.pdf [file 41421_2021_309_MOESM1_ESM.pdf]

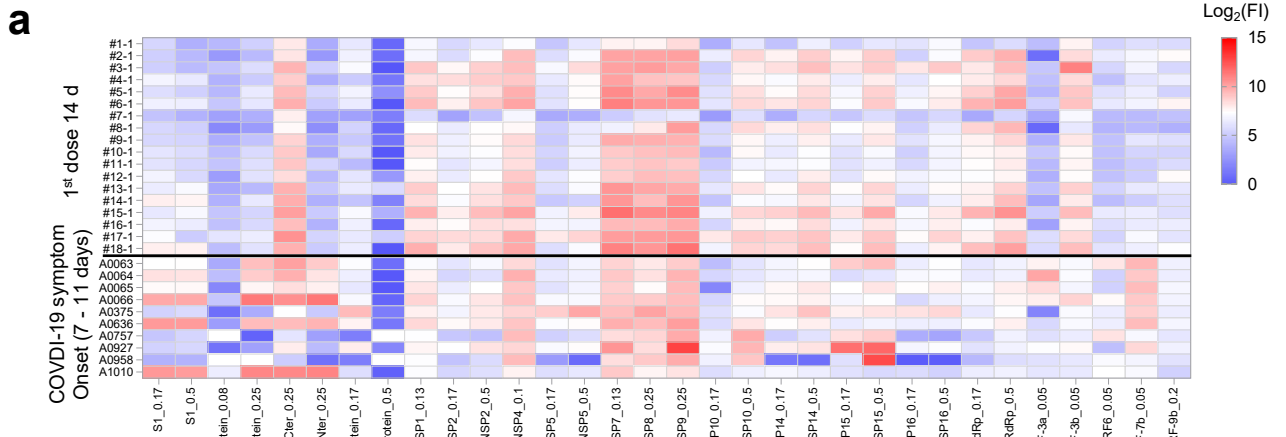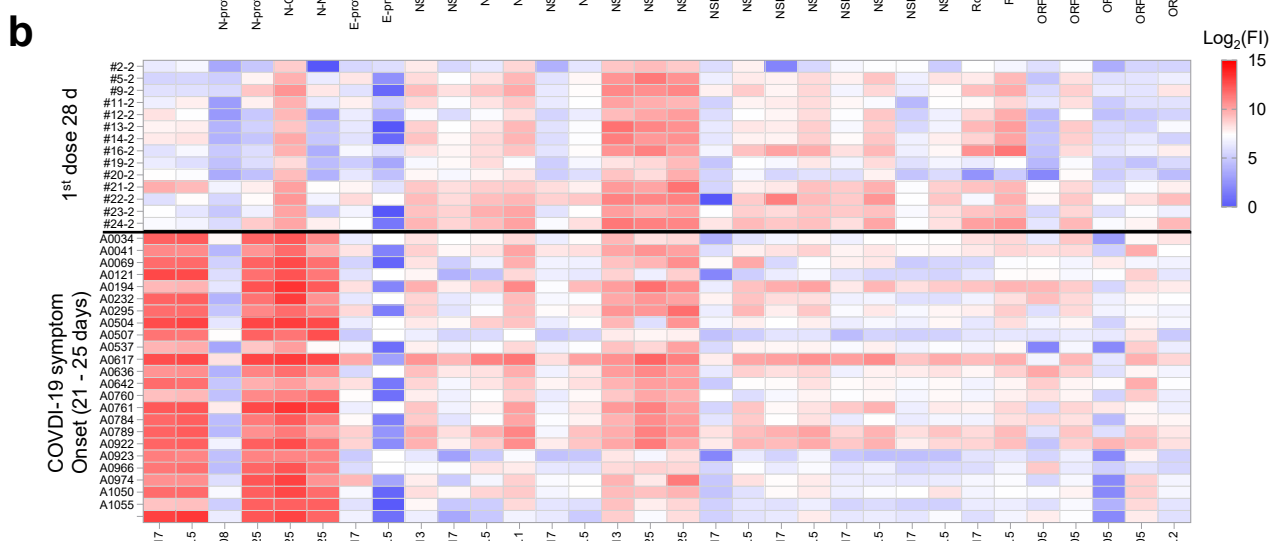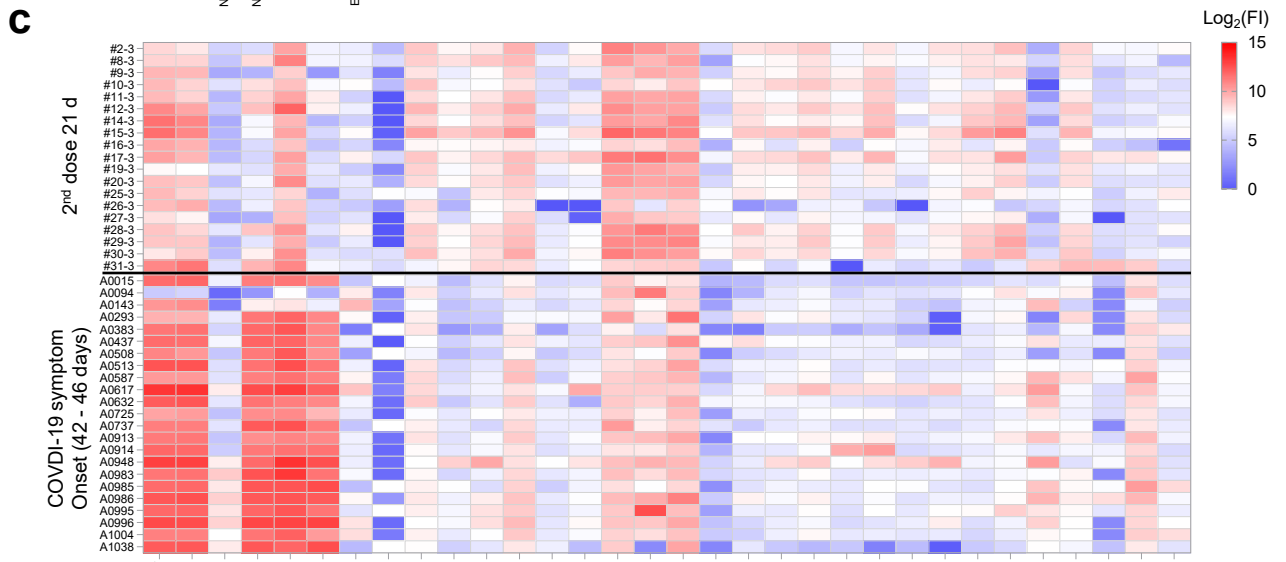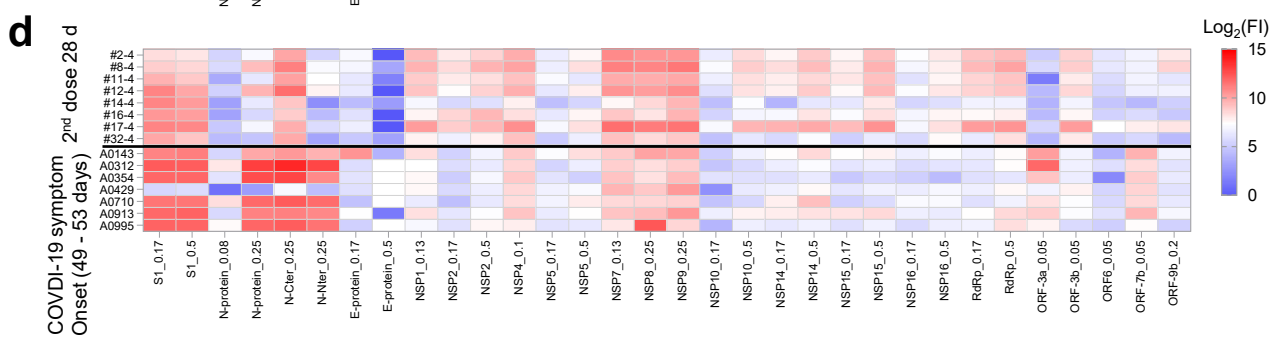

**Supplementary Figure S1. Comparison of SARS-CoV-2-specific IgG responses between vaccinated volunteers and hospitalized patients.**

**a-d** IgG responses of vaccinated volunteers and hospitalized patients against the SARS-CoV-2 proteins. Sera analyzed in each panel were collected at different time points, i.e., 14 days after the 1<sup>st</sup> vaccine dose and 7-11 days after COVID-19 symptom onset (**a**), 28 days after the 1<sup>st</sup> vaccine dose and 21-25 days after COVID-19 symptom onset (**b**), 14 days after the 2<sup>nd</sup> vaccine dose and 42-46 days after COVID-19 symptom onset (**c**) and 28 days after the 2<sup>nd</sup> vaccine dose and 49-53 days after COVID-19 symptom onset (**d**), for the vaccinated volunteers and hospitalized patients, respectively.

**a**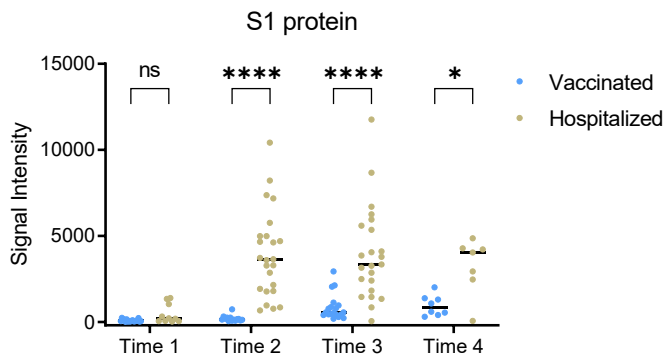**b**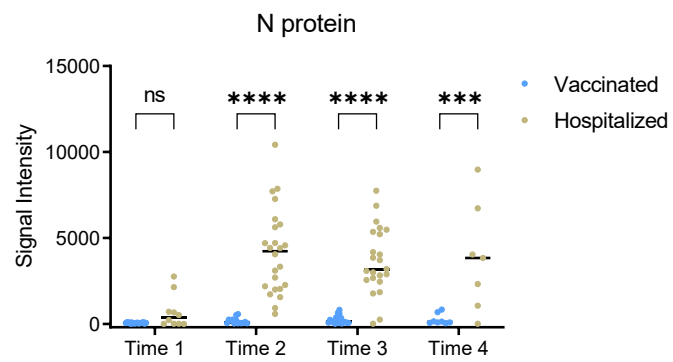**c**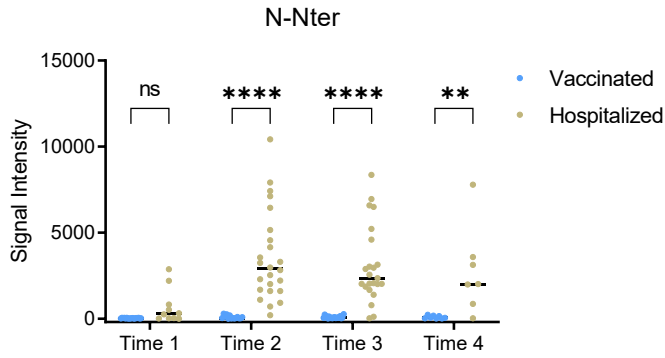**d**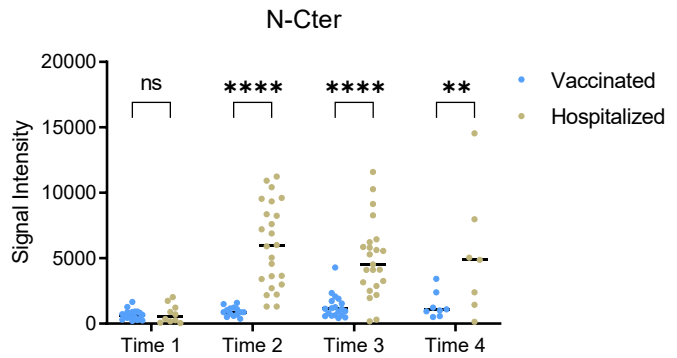**e**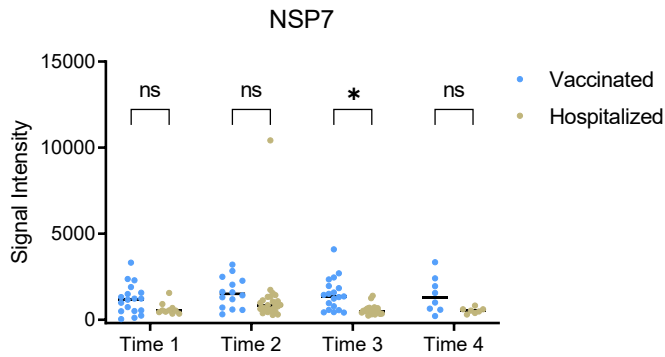**f**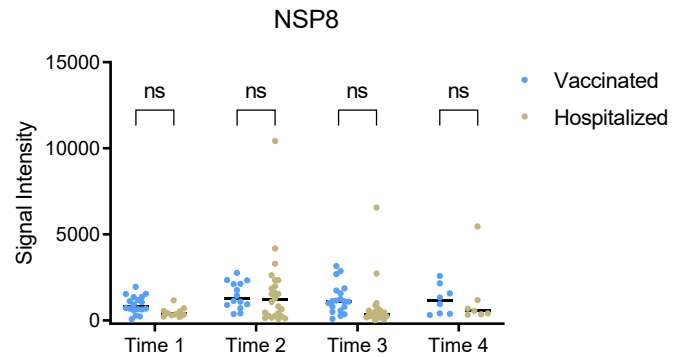**g**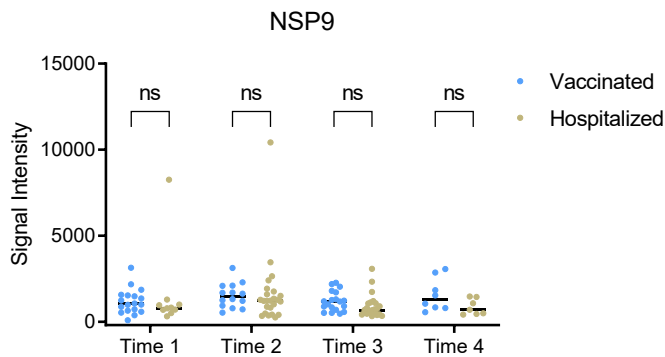**h**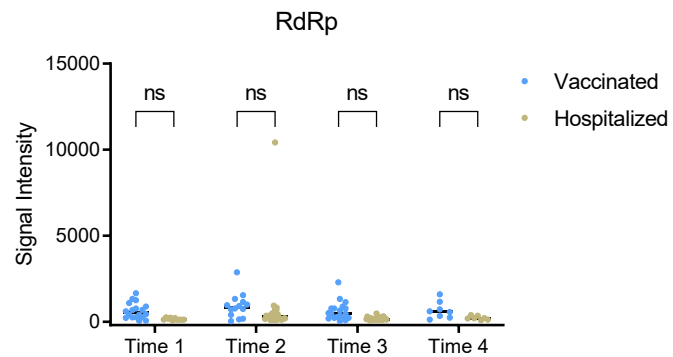

**Supplementary Figure S2. Comparison of SARS-CoV-2-specific IgG responses to representative proteins between vaccinated volunteers and hospitalized patients.**  
**a-h** IgG responses to S1 (a), the N protein (b), N-Nter (c), N-Cter (d), NSP7 (e), NSP8 (f), NSP9 (g) and RdRp (h). *P* values were calculated by the Student's *t*-test, *P* value: \* < 0.05, \*\* < 0.01, \*\*\* < 0.005, \*\*\*\* < 0.001, ns represents no significant difference. Sera collected at comparable time points from both the immunized volunteers and hospitalized patients were compared.

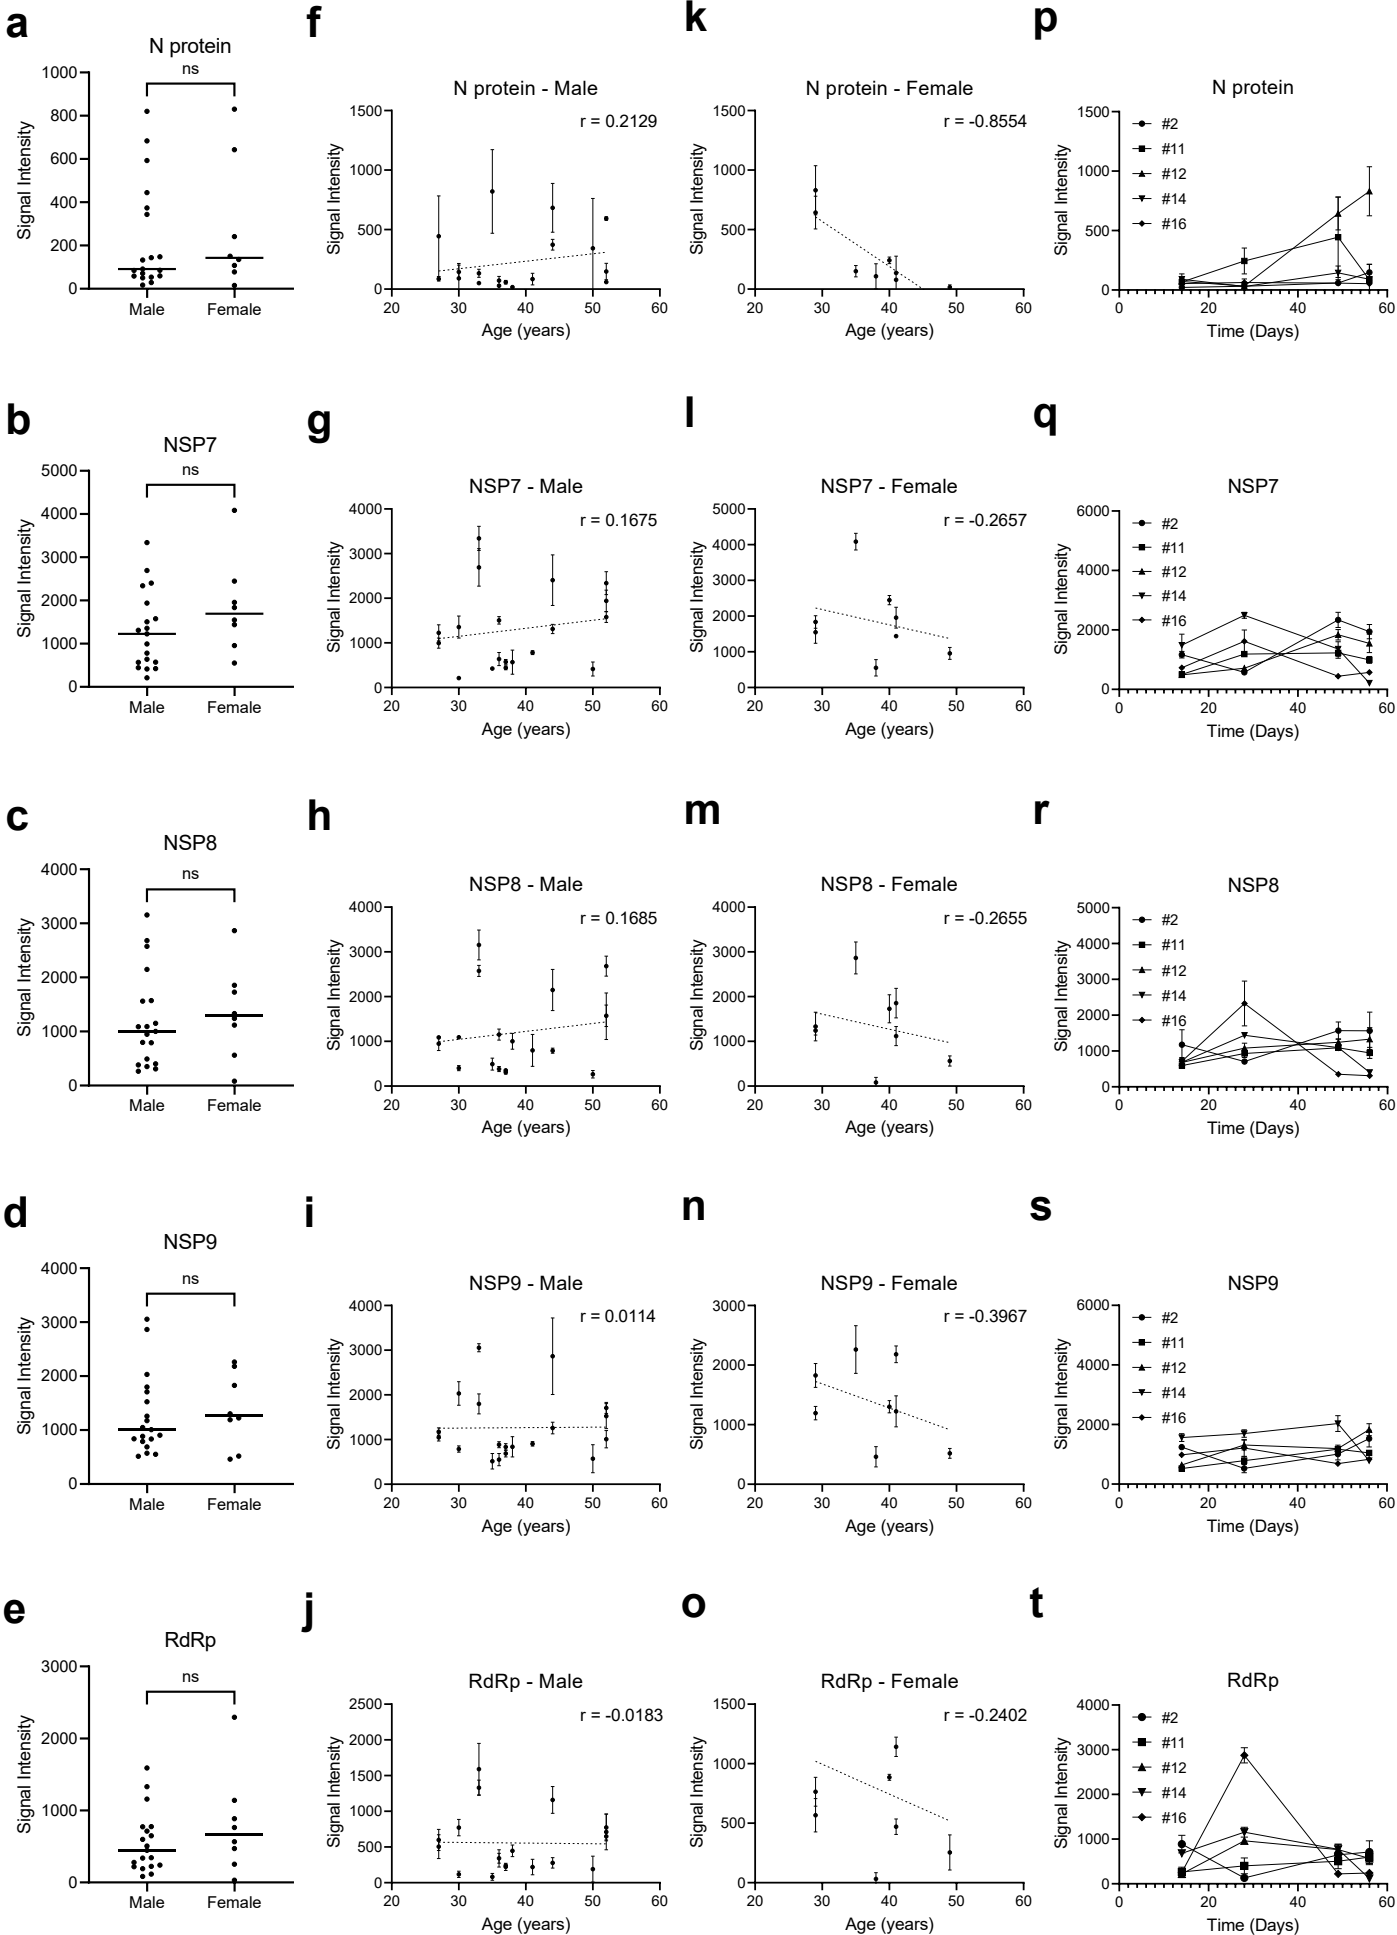

**Supplementary Figure S3. Correlation of protein (proteins other than S, S1 and RBD)-specific IgG responses to age or gender.**

**a-e** IgG responses to the N protein (**a**), NSP7 (**b**), NSP8 (**c**), NSP9 (**d**) and RdRp (**e**) in males vs females. *P* values were calculated by the Student's *t*-test. **f-j** Correlations of IgG responses to age (male). IgG responses to the N protein (**f**), NSP7 (**g**), NSP8 (**h**), NSP9 (**i**), and RdRp (**j**). **k-o** Correlations of IgG responses to age (female). IgG responses to the N protein (**k**), NSP7 (**l**), NSP8 (**m**), NSP9 (**n**), and RdRp (**o**). **p-t** Longitudinal IgG responses to the N protein (**p**), NSP7 (**q**), NSP8 (**r**), NSP9 (**s**) and RdRp (**t**). *P* values are presented as the mean  $\pm$  SEM. Unless otherwise stated, sera collected after the 2nd vaccine dose were analyzed.

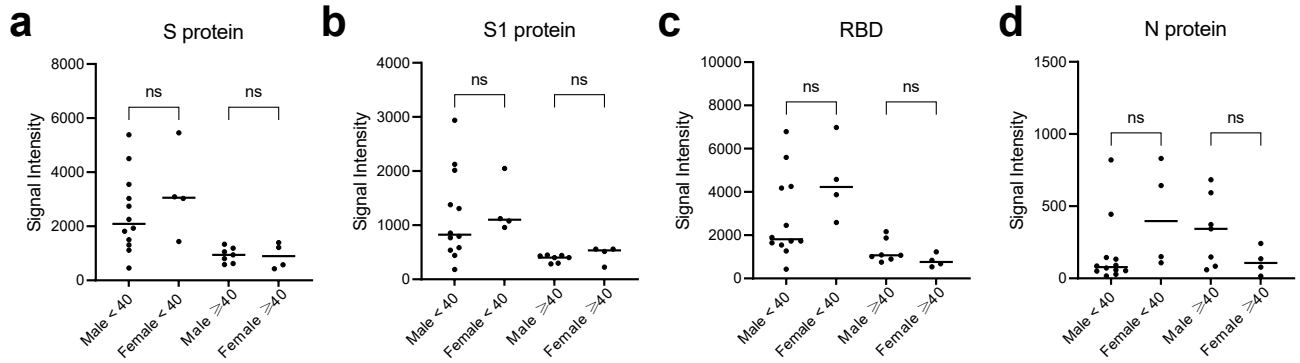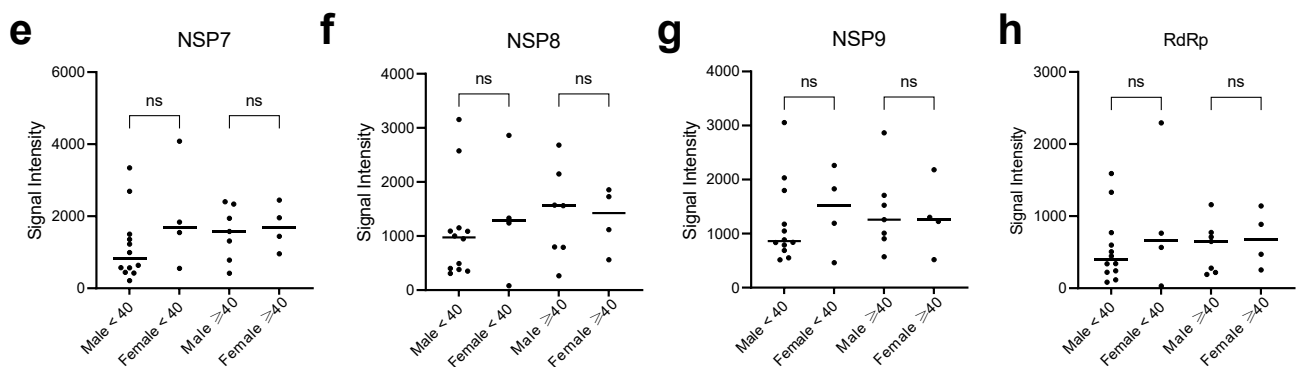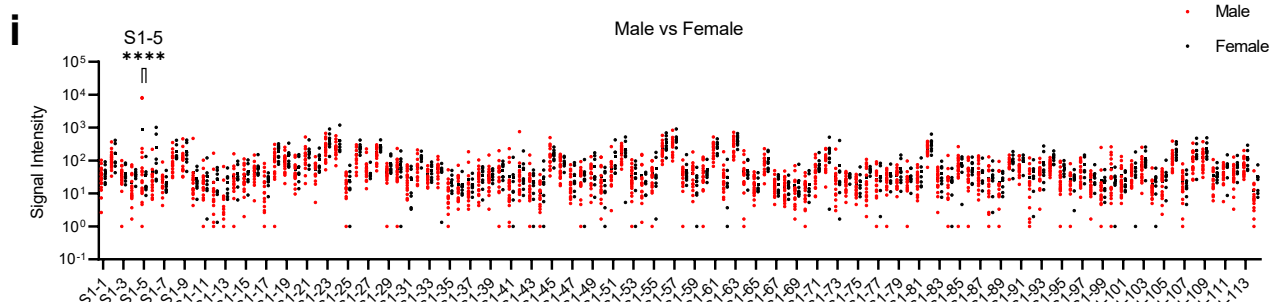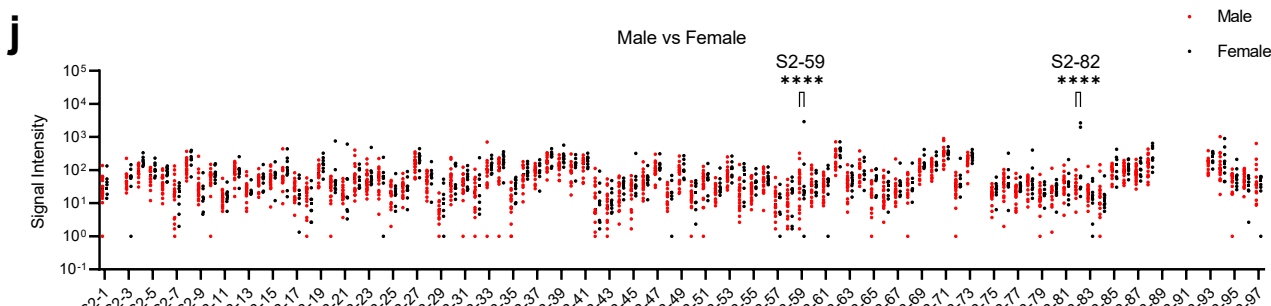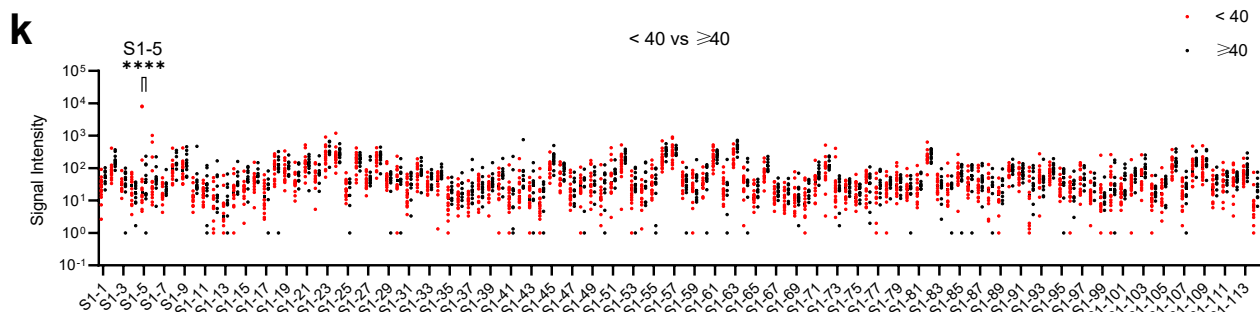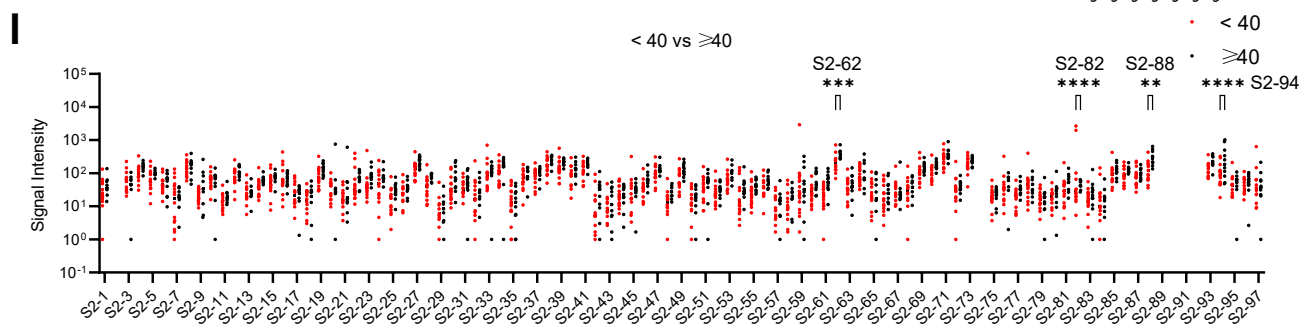

**Supplementary Figure S4. Comparison of peptides-specific IgG responses between different age or gender.**

**a-h** IgG responses to the S protein (**a**), S1 subunit (**b**), RBD (**c**), N protein (**d**), NSP7 (**e**), NSP8 (**f**), NSP9 (**g**) and RdRp (**h**) of males vs females in two groups (<40 and >=40). The *p*-value were calculated by the Student's *t*-test. **i-j** Comparison of peptides-specific IgG responses between male and female. Peptides of S1 (**i**) and S2 (**j**). **k-l** Comparison of peptides-specific IgG responses between <40 and >=40 groups. Peptides of S1 (**k**) and S2 (**l**). The *P* values were calculated by two-way ANOVA, *P* value: \* < 0.05, \*\* < 0.01, \*\*\* < 0.005, and \*\*\*\* < 0.001.

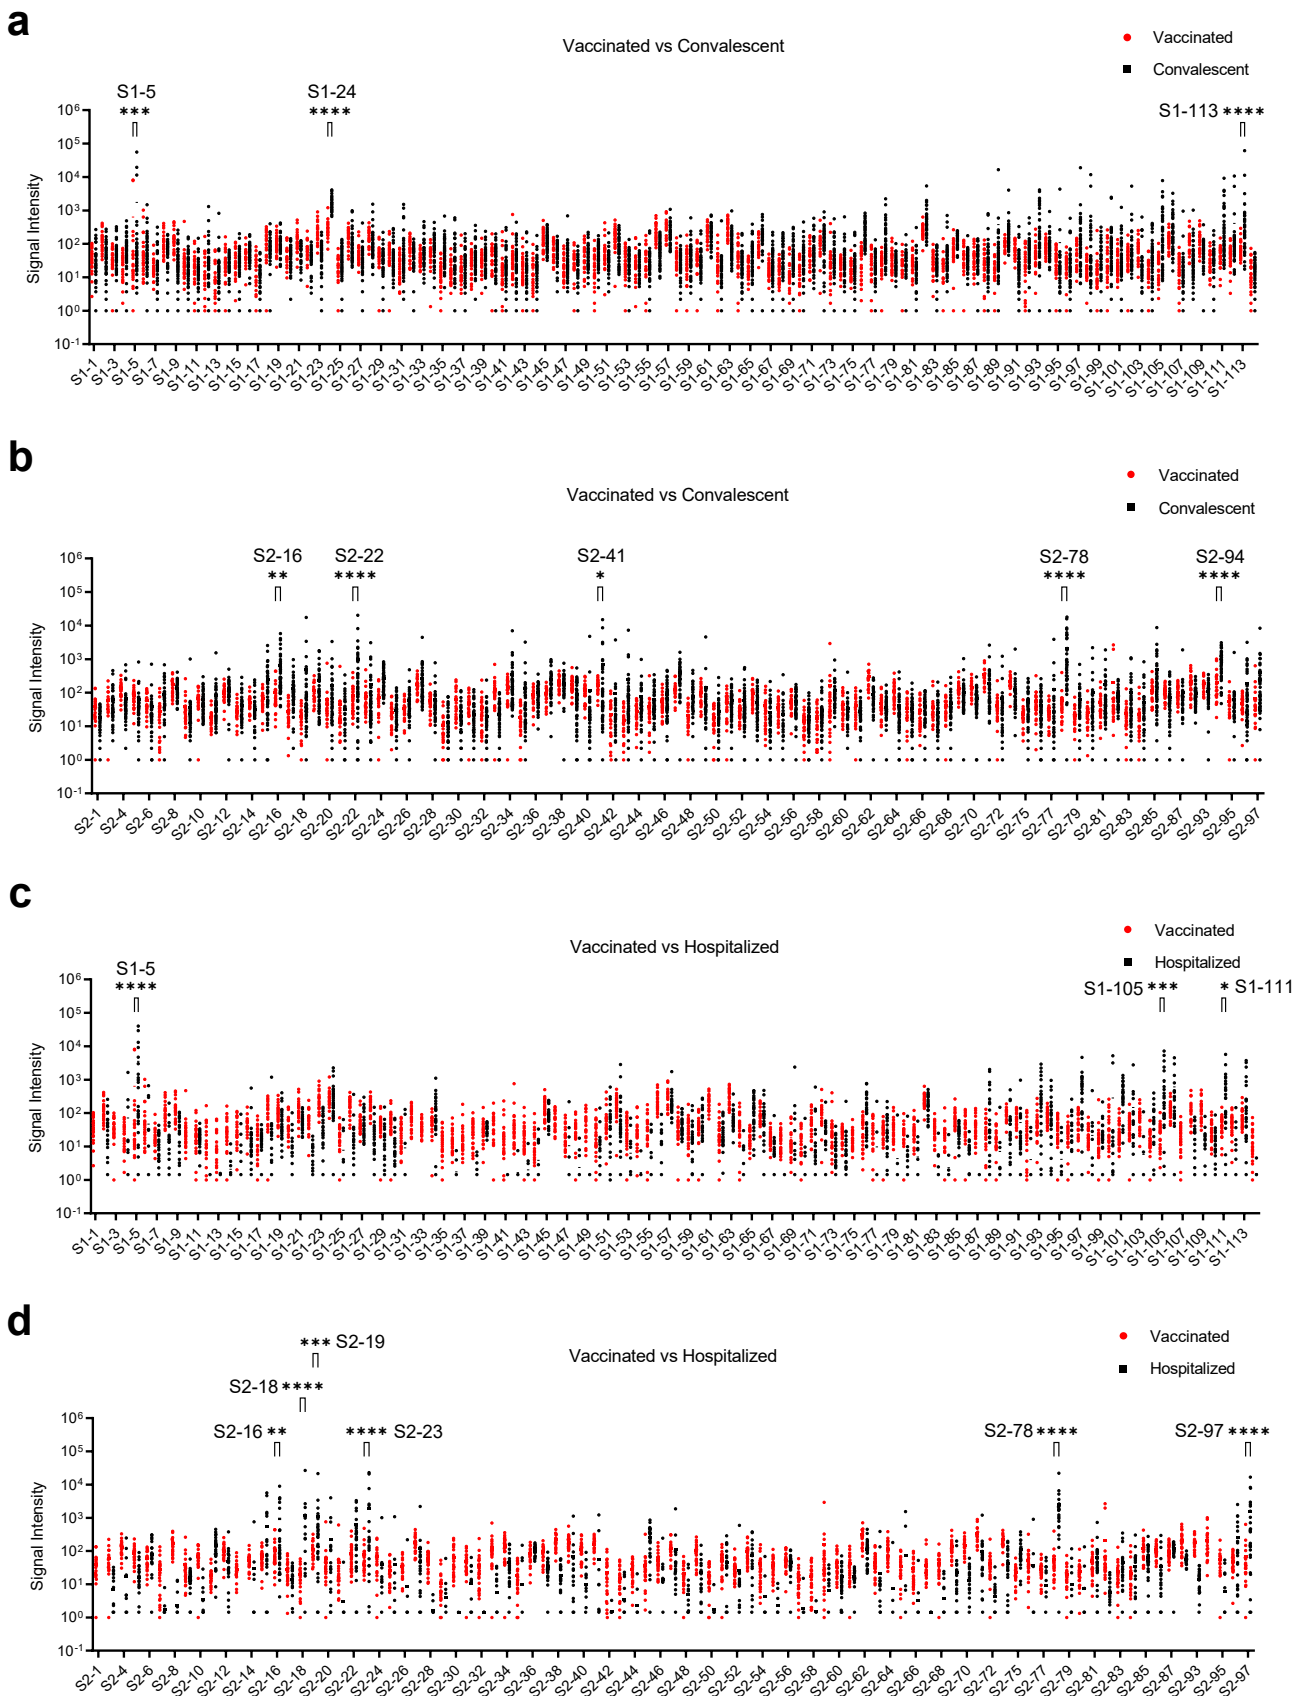

**Supplementary Figure S5. Comparison of peptides-specific IgG responses between vaccinated volunteers and convalescent or hospitalized patients.**

**a-b** Comparison of peptides-specific IgG responses between vaccinated volunteers and convalescent patients. Peptides of S1 (**a**) and S2 (**b**). **c-d** Comparison of peptides-specific IgG responses between vaccinated volunteers and hospitalized patients. Peptides of S1 (**c**) and S2 (**d**). *P* values were calculated by two-way ANOVA, *P* value: \* < 0.05, \*\* < 0.01, \*\*\* < 0.005, and \*\*\*\* < 0.001.



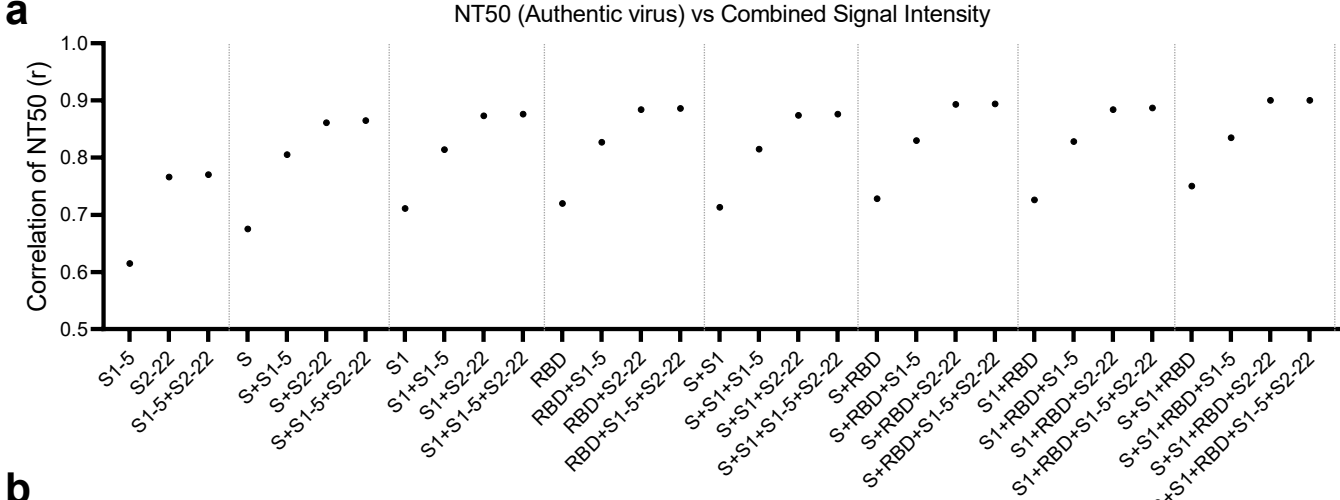

**b**

| Panel               | Correlation (r) | Coefficient (S) | Coefficient (S1) | Coefficient (RBD) | Coefficient (S1-5) | Coefficient (S2-22) | Constant |
|---------------------|-----------------|-----------------|------------------|-------------------|--------------------|---------------------|----------|
| S1-5                | 0.615           | -               | -                | -                 | 0.0089             | -                   | 13.4464  |
| S2-22               | 0.766           | -               | -                | -                 | -                  | 0.3271              | -1.6493  |
| S1-5+S2-22          | 0.770           | -               | -                | -                 | 0.0016             | 0.2923              | -0.4977  |
| S                   | 0.675           | 0.0176          | -                | -                 | -                  | -                   | 2.4911   |
| S+S1-5              | 0.805           | 0.0142          | -                | -                 | 0.0066             | -                   | 1.2601   |
| S+S2-22             | 0.861           | -               | 0.0113           | -                 | -                  | 0.2506              | -7.6276  |
| S+S1-5+S2-22        | 0.865           | 0.0113          | -                | -                 | 0.0018             | 0.2106              | -6.3495  |
| S1                  | 0.711           | 0.0391          | -                | -                 | -                  | -                   | 1.8516   |
| S1+S1-5             | 0.814           | -               | 0.0312           | -                 | 0.0061             | -                   | 1.2089   |
| S1+S2-22            | 0.873           | -               | 0.0256           | -                 | -                  | 0.2403              | -7.6518  |
| S1+S1-5+S2-22       | 0.876           | -               | 0.0255           | -                 | 0.0013             | 0.2123              | -6.6799  |
| RBD                 | 0.720           | -               | -                | 0.0142            | -                  | -                   | 3.2749   |
| RBD+S1-5            | 0.827           | -               | -                | 0.0115            | 0.0062             | -                   | 2.0733   |
| RBD+S2-22           | 0.884           | -               | -                | 0.0096            | -                  | 0.2406              | -7.0404  |
| RBD+S1-5+S2-22      | 0.886           | -               | -                | 0.0096            | 0.0014             | 0.2099              | -5.9997  |
| S+S1                | 0.713           | -0.0045         | 0.0482           | -                 | -                  | -                   | 2.0700   |
| S+S1+S1-5           | 0.815           | 0.0019          | 0.0273           | -                 | 0.0062             | -                   | 1.1112   |
| S+S1+S2-22          | 0.874           | -0.0033         | 0.0323           | -                 | -                  | 0.2400              | -7.4782  |
| S+S1+S1-5+S2-22     | 0.876           | -0.0021         | 0.0299           | -                 | 0.0012             | 0.2140              | -6.6343  |
| S+RBD               | 0.728           | -0.0112         | -                | 0.0224            | -                  | -                   | 4.7070   |
| S+RBD+S1-5          | 0.830           | -0.0073         | -                | 0.0169            | 0.0061             | -                   | 3.0287   |
| S+RBD+S2-22         | 0.893           | -0.0138         | -                | 0.0196            | -                  | 0.2434              | -5.3933  |
| S+RBD+S1-5+S2-22    | 0.894           | -0.0129         | -                | 0.0190            | 0.0010             | 0.2217              | -4.7672  |
| S1+RBD              | 0.726           | -               | 0.0154           | 0.0090            | -                  | -                   | 2.3138   |
| S1+RBD+S1-5         | 0.828           | -               | 0.0064           | 0.0094            | 0.0061             | -                   | 1.6875   |
| S1+RBD+S2-22        | 0.884           | -               | 0.0030           | 0.0086            | -                  | 0.2395              | -7.1780  |
| S1+RBD+S1-5+S2-22   | 0.887           | -               | 0.0025           | 0.0087            | 0.0014             | 0.2093              | -6.1235  |
| S+S1+RBD            | 0.750           | -0.0252         | 0.0387           | 0.0195            | -                  | -                   | 4.0824   |
| S+S1+RBD+S1-5       | 0.835           | -0.0151         | 0.0209           | 0.0157            | 0.0058             | -                   | 2.7824   |
| S+S1+RBD+S2-22      | 0.900           | -0.0223         | 0.0238           | 0.0179            | -                  | 0.2361              | -5.4763  |
| S+S1+RBD+S1-5+S2-22 | 0.900           | -0.0214         | 0.0228           | 0.0176            | 0.0006             | 0.2234              | -5.0984  |

**Supplementary Figure S6. Correlations between neutralization titers (authentic virus) and the combinations of SARS-CoV-2 proteins and peptides.**

**a** Correlation of the NT50 (authentic virus) with combinations. **b** Linear regression equations for combinations.

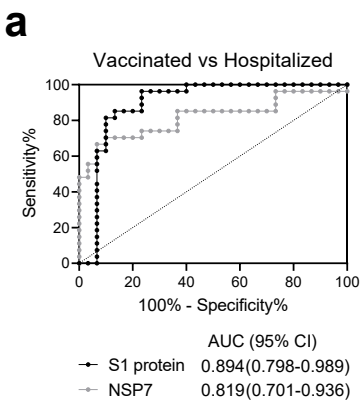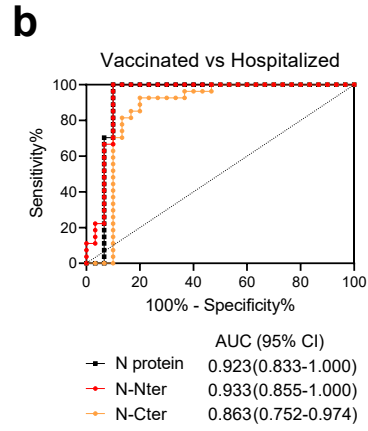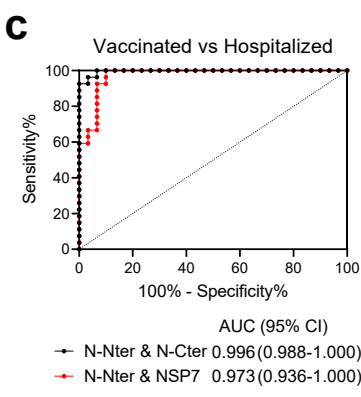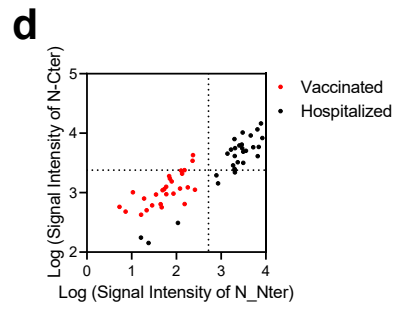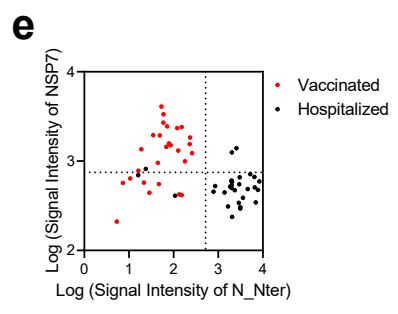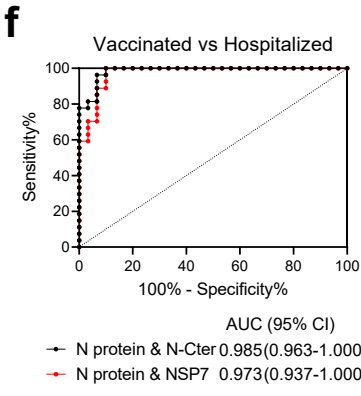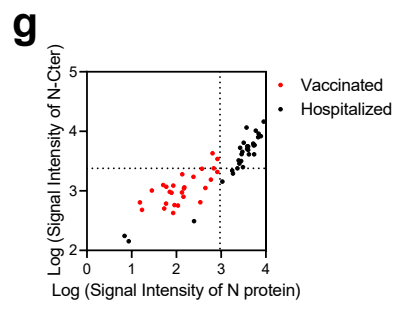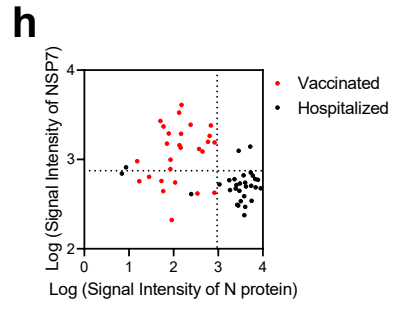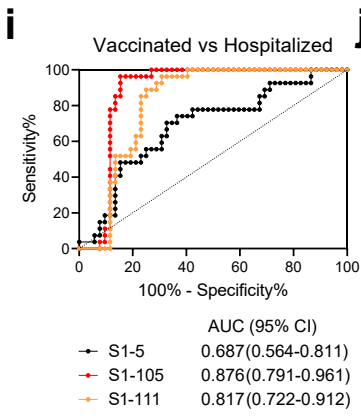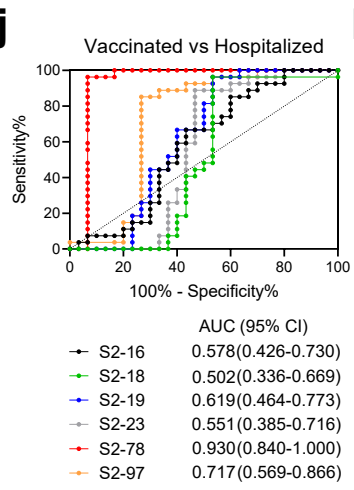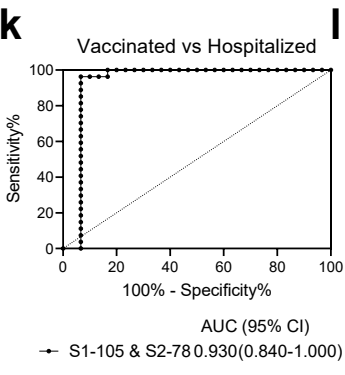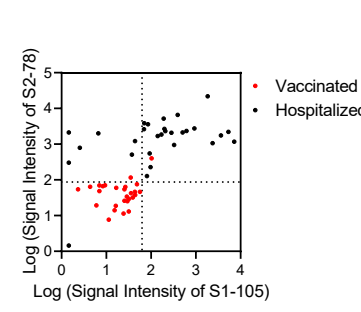

**Supplementary Figure S7. Representative proteins and peptides for differentiating between vaccinated volunteers and hospitalized patients.**

**a-c** ROC analysis of IgG responses to S1 (black) and NSP7 (gray) (**a**), the N protein (black), N-Nter (red) and N-Cter (orange) (**b**), and the combinations of N-Nter and N-Cter (black) or N-Nter and NSP7 (red) (**c**). **d-e** Scatter plots of IgG response of vaccinated volunteers (red dots) and convalescent patients (black dots) for N-Nter vs N-Cter (**d**) and N-Nter vs NSP7 (**e**). **f** ROC analysis of IgG responses to the combination of the N protein and N-Cter (black) and the N protein and NSP7 (red). **g-h** Scatter plots of IgG responses of vaccinated volunteers (red dots) and convalescent patients (black dots) for the N protein vs N-Cter (**g**) and the N protein vs NSP7 (**h**). **i-k** ROC analysis of IgG responses to S1-5 (black), S1-105 (red) and S1-111 (orange) (**i**), S2-16 (black), S2-18 (green), S2-19 (blue), S2-23 (gray), S2-78 (red) and S2-97 (orange) (**j**), and the combination of S1-105 and S2-78 (**k**). **l** Scatter plots of IgG response of vaccinated volunteers (red dots) and convalescent patients (black dots) for S1-105 vs S2-78. The gray lines in **d**, **e**, **g**, **h** and **l** indicate cutoff values based on the optimal Youden index of the related ROC curve. Unless otherwise stated, sera collected after the 2<sup>nd</sup> vaccine dose were analyzed.

**Supplementary Table S1. Neutralization titer of the pseudovirus and the level of anti-RBD antibodies (TAb, IgG, IgM).**

| NT50 of pseudovirus |               |               |               |               |
|---------------------|---------------|---------------|---------------|---------------|
| Volunteer ID        | 1st dose 14 d | 1st dose 28 d | 2nd dose 21 d | 2nd dose 28 d |
| #1                  | <30           | /             | /             | /             |
| #2                  | 64.058        | 154.542       | 282.268       | 182.138       |
| #3                  | <30           | /             | /             | /             |
| #4                  | 429.732       | /             | /             | /             |
| #5                  | 94.320        | <30           | /             | /             |
| #6                  | 142.371       | /             | /             | /             |
| #7                  | 53.786        | /             | /             | /             |
| #8                  | 48.427        | /             | 297.607       | 156.797       |
| #9                  | 334.847       | 79.090        | 191.583       | /             |
| #10                 | 365.810       | /             | 222.738       | /             |
| #11                 | 186.517       | 176.167       | 236.344       | 151.175       |
| #12                 | 205.253       | 233.685       | 298.875       | 294.913       |
| #13                 | 117.799       | 188.523       | /             | /             |
| #14                 | 171.227       | 167.908       | 962.638       | 568.612       |
| #15                 | 100.887       | /             | 247.312       | /             |
| #16                 | 416.785       | 179.503       | 315.399       | 380.591       |
| #17                 | 127.585       | /             | 156.355       | 208.266       |
| #18                 | 255.209       | /             | /             | /             |
| #19                 | /             | 239.770       | 152.520       | /             |
| #20                 | /             | 224.392       | 340.626       | /             |
| #21                 | /             | <30           | /             | /             |
| #22                 | /             | 105.075       | /             | /             |
| #23                 | /             | <30           | /             | /             |
| #24                 | /             | <30           | /             | /             |
| #25                 | /             | /             | 338.575       | /             |
| #26                 | /             | /             | 624.118       | /             |
| #27                 | /             | /             | 447.249       | /             |
| #28                 | /             | /             | 508.227       | /             |
| #29                 | /             | /             | 362.834       | /             |
| #30                 | /             | /             | 296.064       | /             |
| #31                 | /             | /             | 278.789       | /             |
| #32                 | /             | /             | /             | 209.676       |

**Supplementary Table S1. Neutralization titer of the pseudovirus and the level of anti-RBD antibodies (TAb, IgG, IgM). (Continued)**

| Serum ID | anti-RBD antibodies level |                  |                                 |                                 |                                  |  | S/CO    | S/CO (15x dilution) |
|----------|---------------------------|------------------|---------------------------------|---------------------------------|----------------------------------|--|---------|---------------------|
|          | A <sub>450</sub>          | A <sub>450</sub> | A <sub>450</sub> (15x dilution) | A <sub>450</sub> (45x dilution) | A <sub>450</sub> (135x dilution) |  |         |                     |
| #1-1     | 0.000                     | 0.021            | /                               | /                               | /                                |  | 0.350   | /                   |
| #2-1     | 0.214                     | 0.029            | /                               | /                               | /                                |  | 0.620   | /                   |
| #3-1     | 0.000                     | 0.025            | /                               | /                               | /                                |  | 0.060   | /                   |
| #4-1     | 0.078                     | 0.512            | /                               | /                               | /                                |  | 7.320   | /                   |
| #5-1     | 0.062                     | 0.240            | /                               | /                               | /                                |  | 4.180   | /                   |
| #6-1     | 0.144                     | 0.162            | /                               | /                               | /                                |  | 2.550   | /                   |
| #7-1     | -0.001                    | 0.010            | /                               | /                               | /                                |  | 0.010   | /                   |
| #8-1     | -0.003                    | 0.009            | /                               | /                               | /                                |  | 0.110   | /                   |
| #9-1     | 0.008                     | 0.008            | /                               | /                               | /                                |  | 0.040   | /                   |
| #10-1    | 0.168                     | 0.667            | /                               | /                               | /                                |  | 0.570   | /                   |
| #11-1    | 0.022                     | 0.034            | /                               | /                               | /                                |  | 0.030   | /                   |
| #12-1    | 0.107                     | 0.778            | /                               | /                               | /                                |  | 5.410   | /                   |
| #13-1    | 0.364                     | 0.336            | /                               | /                               | /                                |  | 1.050   | /                   |
| #14-1    | 0.027                     | 0.169            | /                               | /                               | /                                |  | 0.100   | /                   |
| #15-1    | 0.015                     | 0.008            | /                               | /                               | /                                |  | 1.120   | /                   |
| #16-1    | 0.007                     | 0.056            | /                               | /                               | /                                |  | 0.050   | /                   |
| #17-1    | 0.026                     | 0.187            | /                               | /                               | /                                |  | 0.890   | /                   |
| #18-1    | 0.042                     | 0.063            | /                               | /                               | /                                |  | 0.330   | /                   |
| #19-2    | -0.004                    | 0.085            | /                               | /                               | /                                |  | 0.030   | /                   |
| #20-2    | 0.028                     | 0.635            | /                               | /                               | /                                |  | 7.300   | /                   |
| #21-2    | 0.681                     | 1.612            | /                               | /                               | /                                |  | 180.090 | /                   |
| #22-2    | 0.005                     | 0.334            | /                               | /                               | /                                |  | 0.220   | /                   |
| #23-2    | 0.024                     | 0.011            | /                               | /                               | /                                |  | 0.050   | /                   |
| #24-2    | 0.003                     | 0.328            | /                               | /                               | /                                |  | 6.870   | /                   |
| #25-3    | 0.169                     | 2.706            | 0.287                           | 0.095                           | 0.041                            |  | 20.930  | /                   |
| #26-3    | 0.068                     | 2.621            | 0.321                           | 0.098                           | 0.042                            |  | 6.170   | /                   |
| #27-3    | 0.002                     | 2.109            | 0.123                           | 0.044                           | 0.027                            |  | 0.190   | /                   |
| #28-3    | 0.045                     | 1.886            | /                               | /                               | /                                |  | 6.770   | /                   |
| #29-3    | 0.010                     | 1.677            | /                               | /                               | /                                |  | 2.690   | /                   |
| #30-3    | 0.008                     | 0.974            | /                               | /                               | /                                |  | 7.030   | /                   |
| #31-3    | 0.092                     | 3.048            | 1.290                           | 0.439                           | 0.157                            |  | 194.150 | /                   |
| #32-4    | 0.025                     | 2.356            | 0.277                           | 0.097                           | 0.041                            |  | 18.910  | /                   |
| #2-2     | 0.005                     | 0.021            | /                               | /                               | /                                |  | 0.040   | /                   |
| #5-2     | 0.059                     | 0.450            | /                               | /                               | /                                |  | 13.850  | /                   |
| #8-3     | 0.014                     | 1.991            | 0.136                           | 0.039                           | 0.020                            |  | 3.500   | /                   |
| #9-2     | 0.015                     | 0.095            | /                               | /                               | /                                |  | 0.080   | /                   |
| #10-3    | 0.360                     | 2.587            | 0.226                           | 0.076                           | 0.031                            |  | 12.220  | /                   |
| #11-2    | 0.022                     | 0.128            | /                               | /                               | /                                |  | 1.030   | /                   |
| #12-2    | 0.041                     | 1.224            | /                               | /                               | /                                |  | 0.830   | /                   |
| #13-2    | 0.100                     | 0.362            | /                               | /                               | /                                |  | 0.220   | /                   |
| #14-2    | 0.147                     | 0.324            | /                               | /                               | /                                |  | 0.190   | /                   |
| #15-3    | 0.708                     | 2.999            | 0.546                           | 0.165                           | 0.051                            |  | 32.340  | /                   |
| #16-2    | 0.231                     | 0.150            | /                               | /                               | /                                |  | 4.150   | /                   |
| #17-3    | 0.174                     | 2.275            | 0.309                           | 0.108                           | 0.041                            |  | 2.760   | /                   |
| #19-3    | 0.010                     | 0.791            | /                               | /                               | /                                |  | 0.360   | /                   |
| #20-3    | 0.093                     | 1.676            | /                               | /                               | /                                |  | 19.390  | /                   |
| #2-3     | 0.222                     | 1.376            | /                               | /                               | /                                |  | 12.150  | /                   |
| #8-4     | -0.001                    | 1.776            | /                               | /                               | /                                |  | 12.240  | /                   |
| #9-3     | 0.002                     | 1.969            | 0.131                           | 0.038                           | 0.015                            |  | 5.580   | /                   |
| #11-3    | 0.585                     | 2.247            | 0.204                           | 0.077                           | 0.037                            |  | 36.480  | /                   |
| #12-3    | 0.063                     | 3.112            | 0.473                           | 0.160                           | 0.047                            |  | 15.340  | /                   |
| #14-3    | 2.139                     | 3.073            | 0.619                           | 0.209                           | 0.073                            |  | 154.680 | /                   |
| #16-3    | 0.058                     | 2.325            | 0.216                           | 0.062                           | 0.026                            |  | 7.100   | /                   |
| #17-4    | 0.185                     | 2.934            | 0.509                           | 0.171                           | 0.065                            |  | 66.570  | /                   |
| #2-4     | 0.256                     | 1.524            | /                               | /                               | /                                |  | 17.000  | /                   |
| #11-4    | 0.264                     | 2.297            | 0.226                           | 0.094                           | 0.035                            |  | 32.330  | /                   |
| #12-4    | 0.066                     | 2.917            | 0.408                           | 0.130                           | 0.039                            |  | 4.890   | /                   |
| #14-4    | 1.599                     | 3.112            | 0.527                           | 0.178                           | 0.060                            |  | 155.880 | /                   |
| #16-4    | 0.013                     | 2.334            | 0.215                           | 0.066                           | 0.019                            |  | /       | 3.490               |

**Supplementary Table S2. Neutralization titers of authentic SARS-CoV-2.**

| NT50 of authentic virus |               |               |               |               |
|-------------------------|---------------|---------------|---------------|---------------|
| Volunteer ID            | 1st dose 14 d | 1st dose 28 d | 2nd dose 21 d | 2nd dose 28 d |
| #1                      | 9.075         | /             | /             | /             |
| #2                      | 6.221         | 10.940        | 20.540        | 14.760        |
| #3                      | 0.000         | /             | /             | /             |
| #4                      | ND            | /             | /             | /             |
| #5                      | 13.760        | ND            | /             | /             |
| #6                      | ND            | /             | /             | /             |
| #7                      | 0.000         | /             | /             | /             |
| #8                      | ND            | /             | 19.710        | 15.340        |
| #9                      | 0.000         | 0.000         | 3.628         | /             |
| #10                     | ND            | /             | 23.080        | /             |
| #11                     | 5.402         | 7.402         | 10.110        | 2.196         |
| #12                     | 14.830        | 5.178         | 18.790        | 19.040        |
| #13                     | 11.270        | 20.390        | /             | /             |
| #14                     | 3.837         | 14.040        | 171.400       | 113.200       |
| #15                     | 0.000         | /             | ND            | /             |
| #16                     | 2.826         | 0.000         | 11.910        | ND            |
| #17                     | ND            | /             | 24.700        | ND            |
| #18                     | 14.660        | /             | /             | /             |
| #19                     | /             | 0.000         | 5.190         | /             |
| #20                     | /             | 0.000         | 46.470        | /             |
| #21                     | /             | ND            | /             | /             |
| #22                     | /             | ND            | /             | /             |
| #23                     | /             | ND            | /             | /             |
| #24                     | /             | ND            | /             | /             |
| #25                     | /             | /             | 31.370        | /             |
| #26                     | /             | /             | 58.680        | /             |
| #27                     | /             | /             | 45.510        | /             |
| #28                     | /             | /             | 13.570        | /             |
| #29                     | /             | /             | 1.564         | /             |
| #30                     | /             | /             | 12.250        | /             |
| #31                     | /             | /             | 59.370        | /             |
| #32                     | /             | /             | /             | ND            |
